# Supplementary material for: When Collaboration Bridges Institutions: The Impact of University–Industry Collaboration on Academic Productivity
Source: Atypon-hosted journal article supplement (doi:10.1287/orsc.2018.1235), 2018-11-09
Supplement: orsc.2018.1235.sm1.pdf [file orsc.2018.1235.sm1.pdf]

## Appendix

### When Collaboration Bridges Institutions: The Impact of University–Industry Collaboration on Academic Productivity

**Table A1- The Comparison between Non-Twin Papers of Scientists with Industry Collaborators and Those without Industry Collaborators**

|                                                                                             | POISSON MODEL                                    | LOGIT MODEL                                                         | POISSON MODEL             |
|---------------------------------------------------------------------------------------------|--------------------------------------------------|---------------------------------------------------------------------|---------------------------|
|                                                                                             | DV = NUMBER OF<br>ACADEMIC<br>CITATIONS RECEIVED | DV = WHETHER THE<br>PAPER CITED IN A<br>PATENT (=1, 0<br>OTHERWISE) | DV = NUMBER OF<br>AUTHORS |
|                                                                                             | (A1-1)                                           | (A1-2)                                                              | (A1-3)                    |
| <b>Academia–industry<br/>collaboration on the twin<br/>published in the same year (0/1)</b> | 0.031<br>(0.154)                                 | 0.153<br>(0.197)                                                    | 0.102<br>(0.086)          |
| Twin fixed effects                                                                          | Yes                                              | Yes                                                                 | Yes                       |
| Observations                                                                                | 447                                              | 372                                                                 | 447                       |
| Log-likelihood                                                                              | -45572.015                                       | -217.310                                                            | -1515.973                 |

Robust standard errors are reported in parentheses. The level of analysis is at the twin-paper level. \*\*\* p<0.01, \*\* p<0.05, \* p<0.1

**Table A2- The Comparison of the Composition of Authorship Team within Twins**

|                                                           | POISSON MODEL                   |                                                                   |                                                        |                                                                                     |
|-----------------------------------------------------------|---------------------------------|-------------------------------------------------------------------|--------------------------------------------------------|-------------------------------------------------------------------------------------|
|                                                           | DV =<br>NUMBER<br>OF<br>FACULTY | DV = NUMBER OF<br>RESEARCH STAFF<br>(GRAD STUDENTS<br>& POSTDOCS) | DV = NUMBER OF<br>AUTHORS W/<br>UNIDENTIFIED<br>STATUS | DV = NUMBER OF<br>TOTAL PRE-<br>DISCOVERY<br>PUBLICATIONS OF THE<br>AUTHORSHIP TEAM |
|                                                           | (A2-1)                          | (A2-2)                                                            | (A2-3)                                                 | (A2-4)                                                                              |
| <b>Academia–<br/>industry<br/>collaboration<br/>(0/1)</b> | 0.249<br>(0.170)                | 0.055<br>(0.136)                                                  | 0.096<br>(0.127)                                       | 0.090<br>(0.201)                                                                    |
| Twin fixed effects                                        | Yes                             | Yes                                                               | Yes                                                    | Yes                                                                                 |
| Observations                                              | 72                              | 72                                                                | 72                                                     | 72                                                                                  |
| Log-likelihood                                            | -103.990                        | -82.281                                                           | -147.784                                               | -5,299.343                                                                          |

Robust standard errors are reported in parentheses. The level of analysis is at the twin-paper level.

\*\*\* p<0.01, \*\* p<0.05, \* p<0.1

**Table A3- Robustness Checks with the Limited Control Set**

|                                                                                              | POISSON MODEL                                |                                                                       |                                              |                                                                       |                                              |                                                                       |
|----------------------------------------------------------------------------------------------|----------------------------------------------|-----------------------------------------------------------------------|----------------------------------------------|-----------------------------------------------------------------------|----------------------------------------------|-----------------------------------------------------------------------|
|                                                                                              | DV = MAIN<br>AUTHOR'S<br>FOLLOW-ON<br>PAPERS | DV = MAIN<br>AUTHOR'S<br>CITATION-<br>WEIGHTED<br>FOLLOW-ON<br>PAPERS | DV = MAIN<br>AUTHOR'S<br>FOLLOW-ON<br>PAPERS | DV = MAIN<br>AUTHOR'S<br>CITATION-<br>WEIGHTED<br>FOLLOW-ON<br>PAPERS | DV = MAIN<br>AUTHOR'S<br>FOLLOW-ON<br>PAPERS | DV = MAIN<br>AUTHOR'S<br>CITATION-<br>WEIGHTED<br>FOLLOW-ON<br>PAPERS |
|                                                                                              | (A3-1)                                       | (A3-2)                                                                | (A3-3)                                       | (A3-4)                                                                | (A3-5)                                       | (A3-6)                                                                |
| <b>Academia-industry<br/>collaboration (0/1)</b>                                             | 0.226*<br>(0.118)                            | 0.267**<br>(0.133)                                                    | -0.357<br>(0.277)                            | -0.243<br>(0.305)                                                     | -0.081<br>(0.161)                            | -0.086<br>(0.198)                                                     |
| <b>Academia-industry<br/>collaboration ×<br/>Discovery has high<br/>commercial potential</b> |                                              |                                                                       | 0.736**<br>(0.300)                           | 0.584*<br>(0.335)                                                     |                                              |                                                                       |
| <b>Academia-industry<br/>collaboration ×<br/>Industry partner is<br/>established</b>         |                                              |                                                                       |                                              |                                                                       | 0.485**<br>(0.221)                           | 0.502**<br>(0.249)                                                    |
| Log(main author's past<br>paper count+1)                                                     | 0.233***<br>(0.083)                          | 0.519***<br>(0.083)                                                   | 0.205***<br>(0.069)                          | 0.506***<br>(0.106)                                                   | 0.238***<br>(0.052)                          | 0.494***<br>(0.097)                                                   |
| Main author affiliated<br>with a U.S. institution                                            | -0.409**<br>(0.083)                          | -0.330*<br>(0.083)                                                    | -0.402**<br>(0.161)                          | -0.332<br>(0.204)                                                     | -0.443**<br>(0.175)                          | -0.385**<br>(0.189)                                                   |
| Twin fixed effects                                                                           | Yes                                          | Yes                                                                   | Yes                                          | Yes                                                                   | Yes                                          | Yes                                                                   |
| Observations                                                                                 | 72                                           | 72                                                                    | 72                                           | 72                                                                    | 72                                           | 72                                                                    |
| Log likelihood                                                                               | -282.218                                     | -20,592.058                                                           | -267.057                                     | -19,753.719                                                           | -273.451                                     | -19,553.834                                                           |
| Paper-twin FE                                                                                | 33                                           | 33                                                                    | 33                                           | 33                                                                    | 33                                           | 33                                                                    |

Robust standard errors are reported in parentheses. The level of analysis is at the twin-paper level.

\*\*\* p<0.01, \*\* p<0.05, \* p<0.1
